# Supplementary material for: Cancer Risk and Prognosis after a Hospital Contact for an Elevated Erythrocyte Sedimentation Rate
Source: Oxford University Press journal article supplement (doi:10.1158/1055-9965.epi-18-0376), 2018-10-23
Supplement: 10559965epi180376-sup-199706_2_supp_4921796_pdskr8.docx [file 10559965epi180376-sup-199706_2_supp_4921796_pdskr8.docx]

| **Supplementary Table S1. Codes for a diagnosis of elevated erythrocyte sedimentation rate (ESR)** | | | |
| --- | --- | --- | --- |
|  | *International Classification of Diseases* (ICD) codes | | |
| ICD-8 |  | ICD-10 |
| Elevated ESR | 788.90 |  | R70.0 |

| **Supplementary Table S2. Classification of autoimmune diseases.** | | | |
| --- | --- | --- | --- |
| Autoimmune disease | *International Classification of Diseases* (ICD) codes | | |
| ICD-8 |  | ICD-10 |
| Hematological system |  |  |  |
| Autoimmune hemolytic anemia | 283.90 |  | D59.0, D59.1 |
| Ideopatic trombocytopenic purpura | 287.10 |  | D69.3 |
| Endocrine system |  |  |  |
| Graves disease | 242.00, 242.01, 242.08, 242.09 |  | E05.0 |
| Autoimmune thyroiditis | 244.01, 245.03 |  | E06.3 |
| Addison´s disease | 255.10 |  | E27.1 |
| Central nervous / neuromuscular system |  |  |  |
| Multiple sclerosis | 340 |  | G35 |
| Myasthenia gravis | 733.09 |  | G70.0 |
| Gastrointestinal / hepatobilliary system |  |  |  |
| Pernicious anemia | 281.00, 281.01, 281.08, 281.09 |  | D51.0 |
| Celiac disease | 269.00 |  | K90.0 |
| Crohn´s disease | 563.01, 563.02, 563.09 |  | K50, M07.4 |
| Ulcerative colitis | 563.19 |  | K51, M07.5 |
| Primary biliary cirrhosis | 571.90 |  | K74.3 |
| Skin |  |  |  |
| Pemphigus / pemphigoid | 694.00-694.03, 694.05 |  | L10.0, L10.2, L10.4, L12.0 |
| Dermatitis herpetiformis | 693.08, 693.09 |  | L13.0 |
| Psoriasis | 696.09, 696.10, 696.19 |  | L40, M07.0-M07.3 |
| Connective tissue diseases |  |  |  |
| Rheumatoid arthritis | 712.19, 712.29, 712.39, 712.59 |  | M05, M06, G73.7D, I32.8A, I39.8E, I41.8A, I52.8° |
| Ankylosing spondylitis | 712.49 |  | M45 |
| Polymyositis / dermatomyositis | 716.09, 716.19 |  | M33 |
| Systemic lupus erythematosus | 734.19 |  | M32, G73.7C, I39.8C, N08.5A, N16.4B |
| Sjögren´s syndrome | 734.90 |  | M35, G73.7A, N16.4A |
| Sarcoidosis | 135.99 |  | D86, G53.2, H22.1A, I41.8B, K77.8B, M63.3 |
| Vasculitis syndromes |  |  |  |
| Polyarteritis nodosa | 446.09 |  | M30.0 |
| Wegener´s granulomatosis | 446.29 |  | M31.3 |
| Temporal arteritis / polymyalgia rheumatica | 446.30, 446.31, 446.39 |  | M31.5, M31.6, M35.3 |

**Supplementary Table S3. Classification of infections in the ICD system.**

| Infections | *International Classification of Diseases* (ICD) codes | |
| --- | --- | --- |
| ICD-8 | ICD-10 |
| Gastrointestinal infection | 000-009 | A00-A09 |
| Tuberculosis | 010-018 | A15-A19 |
| Miscellaneous bacterial infections | 020-031, 037,039, 080-083, 088, 089, 100-104 | A20-A38, A42-A44, A48-A49, A65-A79, |
| Meningococcal disease | 036 | A39 |
| Septicemia | 038 | A40-A41 |
| Sexually transmitted diseases | 090-099 | A50-A64 |
| Herpes simplex or zoster | 053-054 | B00, B02 |
| Viral hepatitis | 070 | B15-B19 |
| HIV |  | B20-B24 |
| Miscellaneous viral infections | 050-052, 055-057, 060-61, 067-068, 071-079, | A80-A99, B01, B03-B09, B25-B34 |
| Candidiasis and other fungal infections | 110-117 | B35-B49 |
| Parasitic infections | 084-087, 120-136 | B50-B89 |
| Other infections or sequelae | 019, 044, 066, 380-384, | B90-B99, H60, H62, H65-H67, H70 |
| CNS infections (except meningococcal disease) | 040-043, 045-046, 062-065, 320, 322-323, | G00-G07 |
| Heart infections (acute rheumatic fever, infectious peri- or myocarditis, endocarditis) | 390-391, 420-424, | I00-I02, I30.1, I32.0, I33, I38, I40.0 |
| Upper respiratory tract infection | 032, 034, 460-465, 501, 503, 508, | J00-J06, J36, J39.0 |
| Influenza | 470-474, | J10-J11 |
| Pneumonia | 480-486 | J12-J18 |
| Other lower respiratory tract infection | 033, 466, 510, 513 | J20-J22, J85.1, J86 |
| Intra-abdominal infections (appendicitis, abscesses, peritonitis, cholecystitis, etc.) | 540-542, 566-567, 572, 575, | K35, K37, K57.0, K57.2, K57.4, K57.8, K61, K63.0, K65.0, K65.9, K67, K75.0, K75.1, K80.0, K80.3, K80.4, K81.0, K81.9, K83.0 |
| Skin infections, including cellulitis/erysipelas | 035, 680-686 | A46, L00-L03, L05-L08 |
| Septic arthritis, osteomyelitis | 710-711, 720, | M00, M01, M86 |
| Urinary tract infections | 590, 595, 599.06, | N10, N12, N15.1, N30, N39.0 |
| Male genital infections (prostatitis, orchitis, epididymitis) | 601, 604, | N41, N45 |
| Female pelvic infections (salpingo-oophoritis, uterine infection, vulvovaginitis etc.) | 612-614, 620, 622, 629.49, | N70-N77 |
